# Supplementary material for: Improved photovoltaic performance of perovskite solar cells based on three-dimensional rutile TiO2 nanodendrite array film
Source: Royal Society of Chemistry journal article supplement (doi:10.1039/c8nr06899b), 2018-01-01
Supplement: c8nr06899b1.pdf [file c8nr06899b1.pdf]

## Electronic Supplementary Information

### Improved photovoltaic performance of perovskite solar cells based on three-dimensional rutile TiO<sub>2</sub> nanodendrite array film

Chi Chen, Shufang Wu, Jinming Wang, Siyao Chen, Tianyou Peng\* and Renjie Li\*

*College of Chemistry and Molecular Sciences, Wuhan University, Wuhan 430072, PR China*

\*Corresponding Author. E-mail: typeng@whu.edu.cn (T. Y. Peng); lirj@whu.edu.cn (R. J. Li).

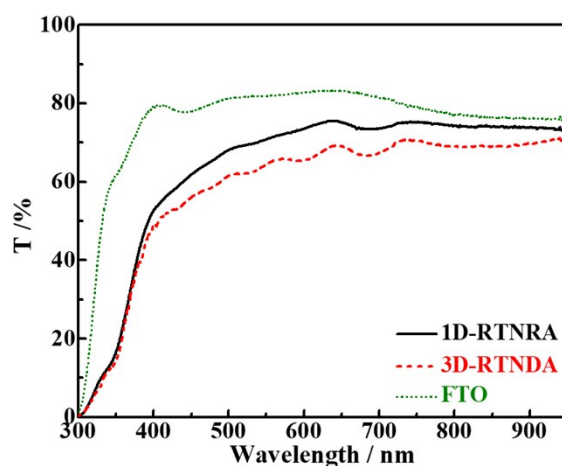

**Fig. S1** Optical transmittance spectra of the bare FTO glass, the 1D-RTNRA and 3D-RTNDA films on FTO glass.

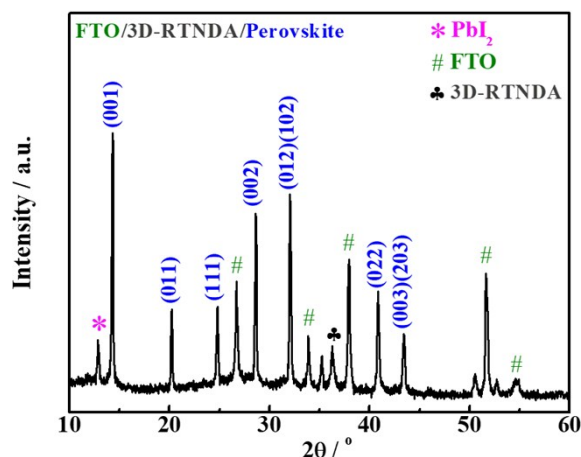

**Fig. S2** XRD pattern of the perovskite layer loaded on the 3D-RTNDA film.

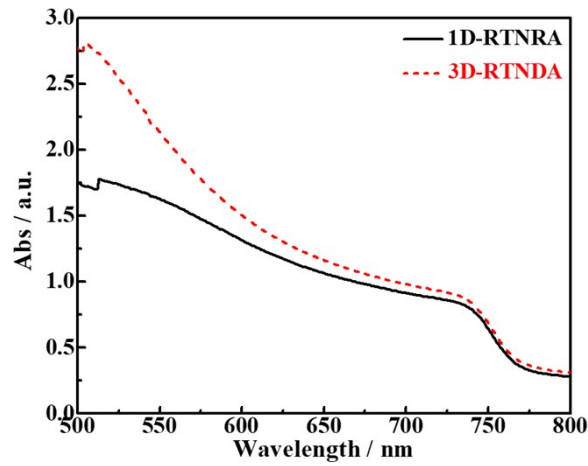

**Fig. S3** UV-Vis absorption spectra of the perovskite layers loaded on the 1D-RTNRA and 3D-RTNDA films.

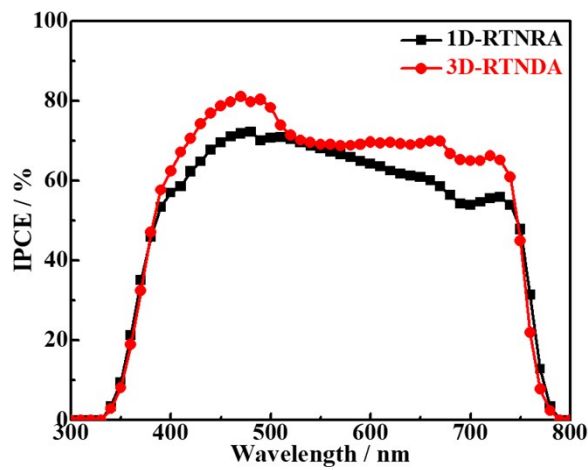

**Fig. S4** IPCE curves of the PSCs fabricated with the 1D-RTNRA and 3D-RTNDA films.

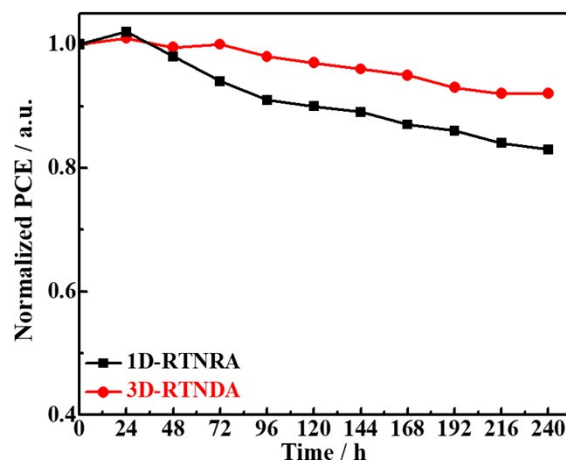

**Fig. S5** Long-term stabilities of the PSCs fabricated with the 1D-RTNRA and 3D-RTNDA films. Those PSCs without encapsulation were stored at ambient condition in the dark at room temperature with a humidity of ~20%.

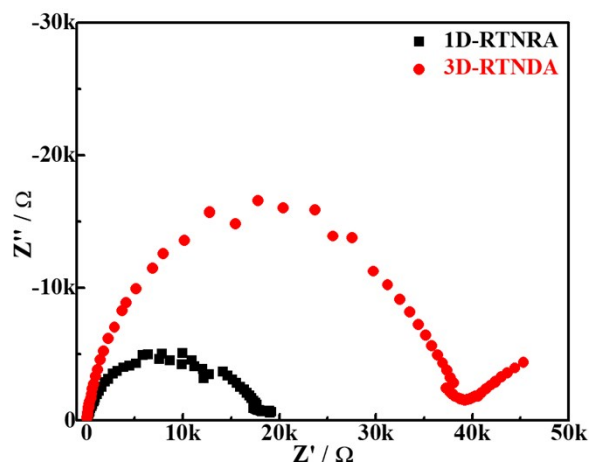

**Fig. S6** EIS spectra of the PSCs fabricated with the 1D-RTNRA and 3D-RTNDA films measured under dark at 0.6 V.
